# Supplementary material for: Phosphorylation-Dependent Inhibition of Akt1
Source: MDPI journal article supplement (doi:10.3390/genes9090450), 2018-09-07
Supplement: s1 [file s1]

## Supplementary Materials for

### Phosphorylation-dependent inhibition of Akt1

Nileeka Balasuriya<sup>1</sup>, McShane McKenna<sup>1</sup>, Xuguang Liu<sup>1</sup>, Shawn S. C. Li<sup>1</sup>, and Patrick O'Donoghue<sup>1,2,†</sup>

<sup>1</sup>Department of Biochemistry, <sup>2</sup>Department of Chemistry, The University of Western Ontario, London, ON N6A 5C1, Canada.

†To whom correspondence should be addressed:

Email: [patrick.odonoghue@uwo.ca](mailto:patrick.odonoghue@uwo.ca)

### Supplementary Materials and Methods

**Affinity column chromatography.** The His-tagged proteins were purified using Ni affinity column chromatography. 0.5 ml of Ni-NTA resin (Thermo-Fisher Scientific) was used for 1 l of *E. coli* culture. The cell lysates (see Methods) were loaded into the column (2 ml column volume) and washed with 20 column volumes of wash buffer A (20 mM Hepes, 150 mM NaCl, 3 mM  $\beta$ -mercaptoethanol, 3mM Dithiothreitol, 1 mM Na<sub>3</sub>VO<sub>4</sub> and 5 mM NaF, 15 mM imidazole) followed by 10 column volumes of wash buffer B (20 mM Hepes, 150 mM NaCl, 3 mM  $\beta$ -mercaptoethanol, 3mM DTT, 1 mM Na<sub>3</sub>VO<sub>4</sub> and 5 mM NaF, 20 mM imidazole). Protein was eluted using an elution buffer (20 mM Hepes, 150 mM NaCl, 3 mM  $\beta$ -mercaptoethanol, 3mM dithiothreitol, 1 mM Na<sub>3</sub>VO<sub>4</sub> and 5 mM NaF) with 75 mM Imidazole. The same protocol was used for Akt1 variants with phosphomimetic mutations except: 1) phosphatase inhibitors were excluded from the buffers, 2) the imidazole concentrations of the wash buffers were 20 - 50 mM, and 3) the imidazole concentration of the elution buffer was 200 mM. Fractions were run on 10% SDS (sodium dodecyl sulfate) poly-acrylamide gels. As detailed previously [1], Akt1 variants were further purified by size exclusion chromatography.

### Supplementary References

1. Balasuriya, N.; Kunkel, M.T.; Liu, X.; Biggar, K.K.; Li, S.S.; Newton, A.C.; O'Donoghue, P. Genetic code expansion and live cell imaging reveal that thr308 phosphorylation is irreplaceable and sufficient for akt1 activity. *J Biol Chem* **2018**, 293, 10744-10756.
2. George, S.; Aguirre, J.D.; Spratt, D.E.; Bi, Y.; Jeffery, M.; Shaw, G.S.; O'Donoghue, P. Generation of phospho-ubiquitin variants by orthogonal translation reveals codon skipping. *FEBS Lett* **2016**, 590, 1530-1542.

**Table S1.** Plasmids used in this study.

| Plasmid ID               | Plasmid backbone | Selectable marker | Inserted genes                                | Genetic modifications                                                                                        | Protein product                                                                                                     |
|--------------------------|------------------|-------------------|-----------------------------------------------|--------------------------------------------------------------------------------------------------------------|---------------------------------------------------------------------------------------------------------------------|
| (1) WT Akt1              | pDS0 (pUC) [2]   | Amp               | <i>AKT1</i>                                   | None.                                                                                                        | Akt1, unphosphorylated. (full-length, inactive) [1]                                                                 |
| (2) WT Akt1-PDK1         | pCDF-Duet-1      | Strep             | <i>AKT1</i><br><i>PDK1</i>                    | None.                                                                                                        | Akt1, phosphorylated at position T308. (full-length, active) [1]                                                    |
| (3) Akt1 UAG473          | pCDF-Duet-1      | Strep             | <i>AKT1</i>                                   | UAG mutation at position 473 in <i>AKT1</i> .                                                                | Akt1, phosphorylated at position S473. (full-length, slightly active) [1]                                           |
| (4) Akt1-UAG473-PDK1     | pCDF-Duet-1      | Strep             | <i>AKT1</i><br><i>PDK1</i>                    | UAG mutation at position 473 in <i>AKT1</i> .                                                                | Akt1, phosphorylated at positions T308 and S472. (full-length, highly active) [1]                                   |
| (5) pSer-OTS             | pDS-pSer2        | Kan               | tRNA <sup>sep</sup> (5x)<br>SepRS9<br>EFSep21 | This system is comprised of the 2 <sup>nd</sup> generation mutants of the pSer incorporation system.         | pSer orthogonal translation system, capable of decoding UAG codons and incorporating pSer into nascent peptides [2] |
| (6) ΔPH-WT Akt1          | pDS0 (pUC) [2]   | Amp               | <i>AKT1</i>                                   | Deletion of the PH domain from <i>AKT1</i> (Δ residues 2-109).                                               | ΔPH-Akt1, unphosphorylated. (truncated, inactive)                                                                   |
| (7) ΔPH-WT Akt1-PDK1     | pCDF-Duet-1      | Strep             | <i>AKT1</i><br><i>PDK1</i>                    | Deletion of the PH domain from <i>AKT1</i> (Δ residues 2-109).                                               | ΔPH-Akt1, phosphorylated at position T308. (truncated, active)                                                      |
| (8) ΔPH-Akt1-UAG473      | pCDF-Duet-1      | Strep             | <i>AKT1</i>                                   | Deletion of the PH domain from <i>AKT1</i> (Δ residues 2-109). UAG mutation at position 473 in <i>AKT1</i>   | ΔPH-Akt1, phosphorylated at position S473. (truncated, slightly active)                                             |
| (9) ΔPH-Akt1 UAG473-PDK1 | pCDF-Duet-1      | Strep             | <i>AKT1</i><br><i>PDK1</i>                    | Deletion of the PH domain from <i>AKT1</i> (Δ residues 2-109). UAG mutation at position 473 in <i>AKT1</i> . | ΔPH-Akt1, phosphorylated at positions T308 and S472. (truncated, highly active)                                     |

## Supplementary Figures

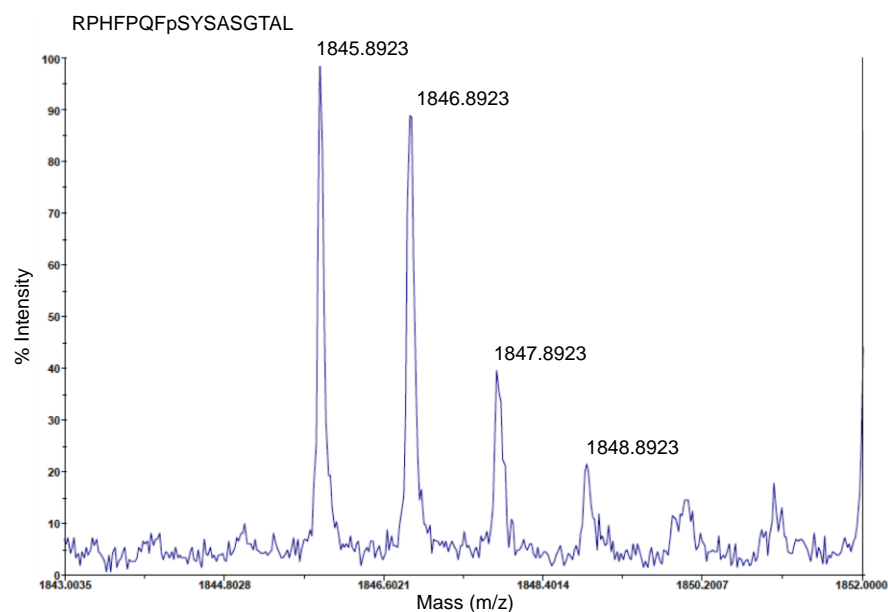

**Figure S1.** Mass spectra confirming genetically encoded phosphoserine in  $\Delta\text{PH-ppAkt1}$ . Tryptic digested peptides of  $\Delta\text{PH-ppAkt1}^{\text{T308,S473}}$  were subjected to MALDI-TOF mass spectrometry. The C-terminal peptide of  $\Delta\text{PH-Akt1}$  carrying a single phosphorylation was readily detected. The isotopic masses of the peptide carrying the most abundant peak of  $^{12}\text{C}$  isotope (observed m/z = 1845.8923; expected m/z = 1845.8378) and the 3 consecutive peaks with  $^{13}\text{C}$  isotopes (m/z = 1846.8923, 1847.8923, 1848.8923, respectively) are shown.

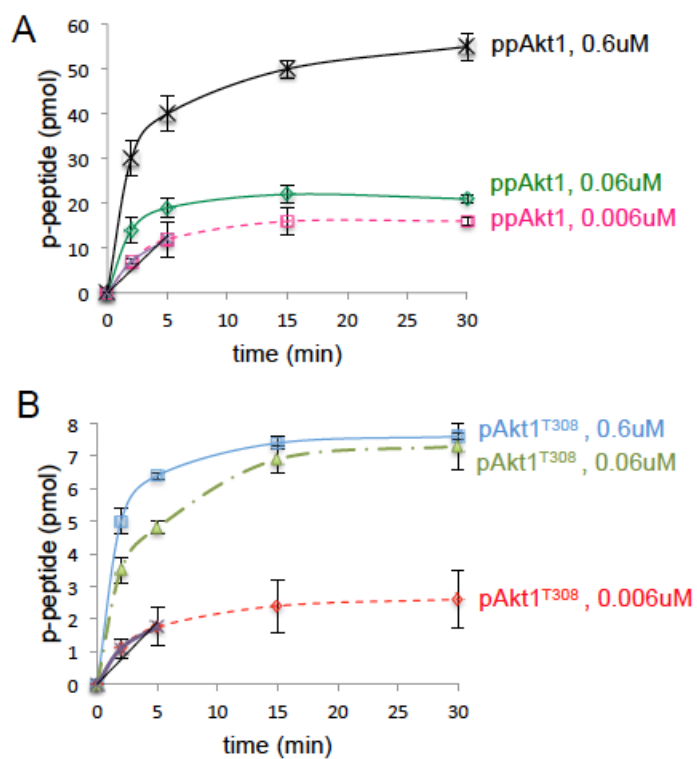

**Figure S2.** Initial velocity measurements for highly active  $\Delta$ PH Akt1 variants. (A)  $\Delta$ PH-ppAkt1<sup>T308, S473</sup> and (B)  $\Delta$ PH-pAkt1<sup>T308</sup> were diluted by 10-fold and 100-fold, respectively, to obtain a linear range of increasing enzyme activity. Initial velocities were calculated using the data points at the linear range of 100-fold diluted enzyme.

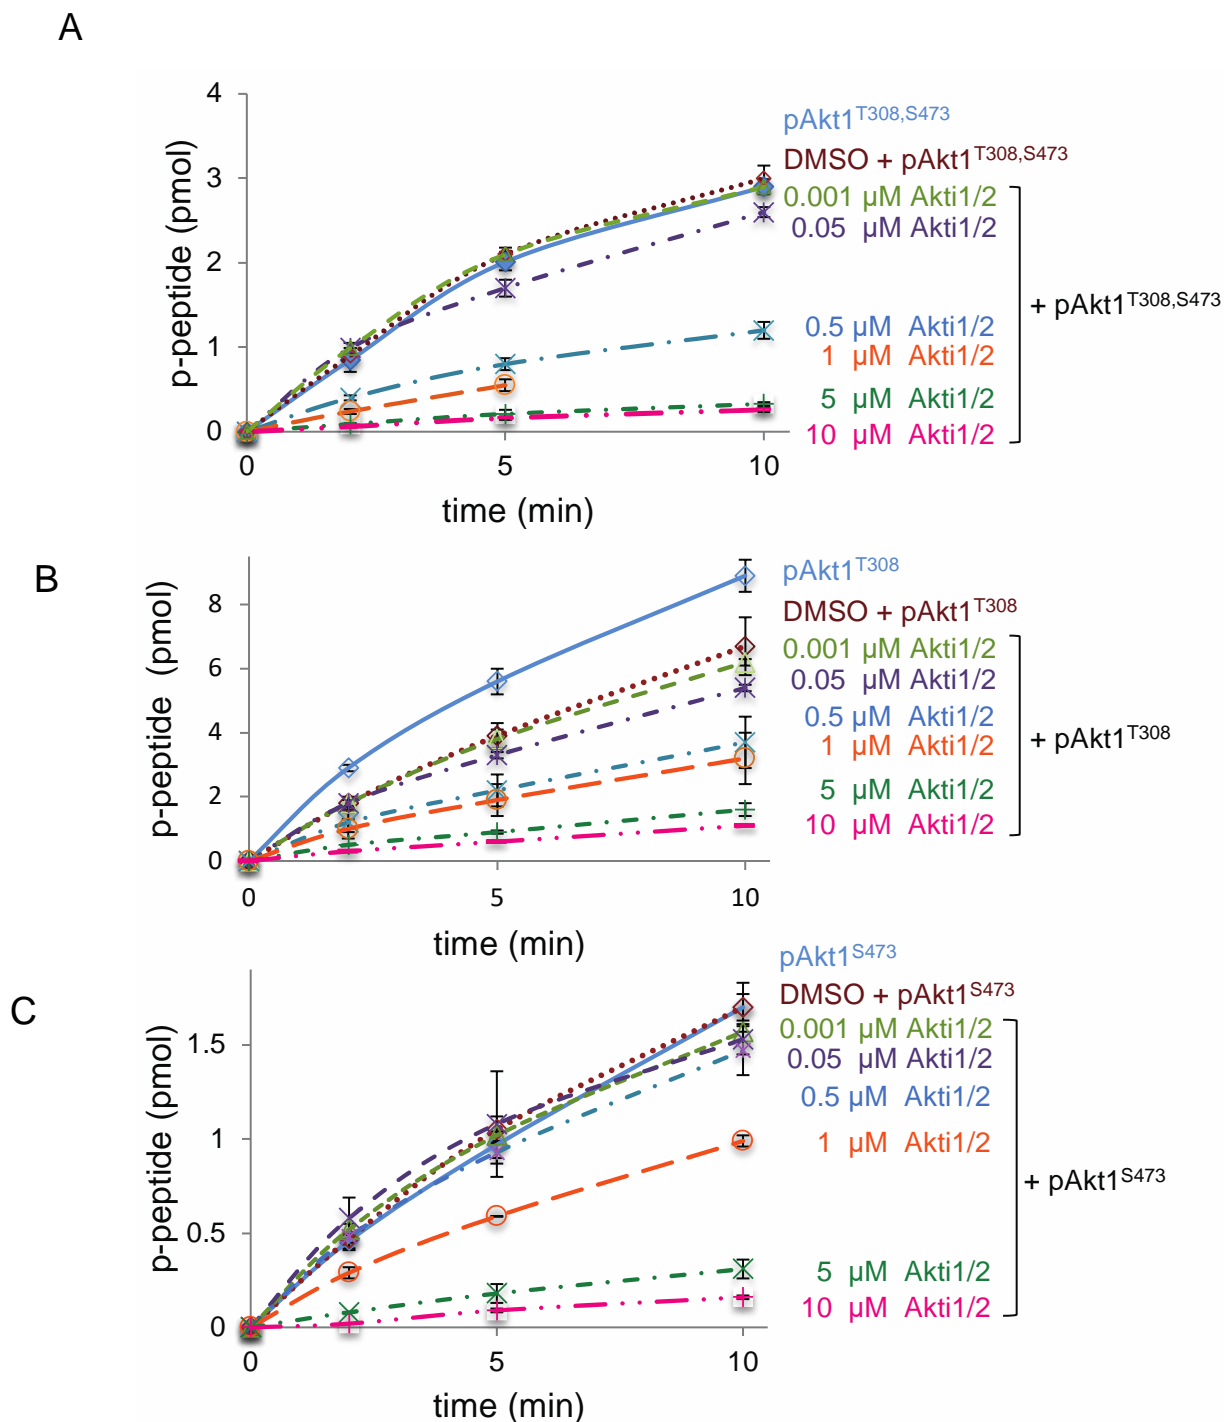

**Figure S3.** Inhibition of the full length Akt1 variants incubated with Akti-1/2 inhibitor VIII. (A) ppAkt1<sup>T308, S473</sup>, (B) pAkt1<sup>T308</sup>, (3) pAkt1<sup>S473</sup> variants were incubated with increasing concentrations (0.001 uM to 10 uM) of Akti1/2. Error bars indicate 1 standard deviation based on triplicate experiments.

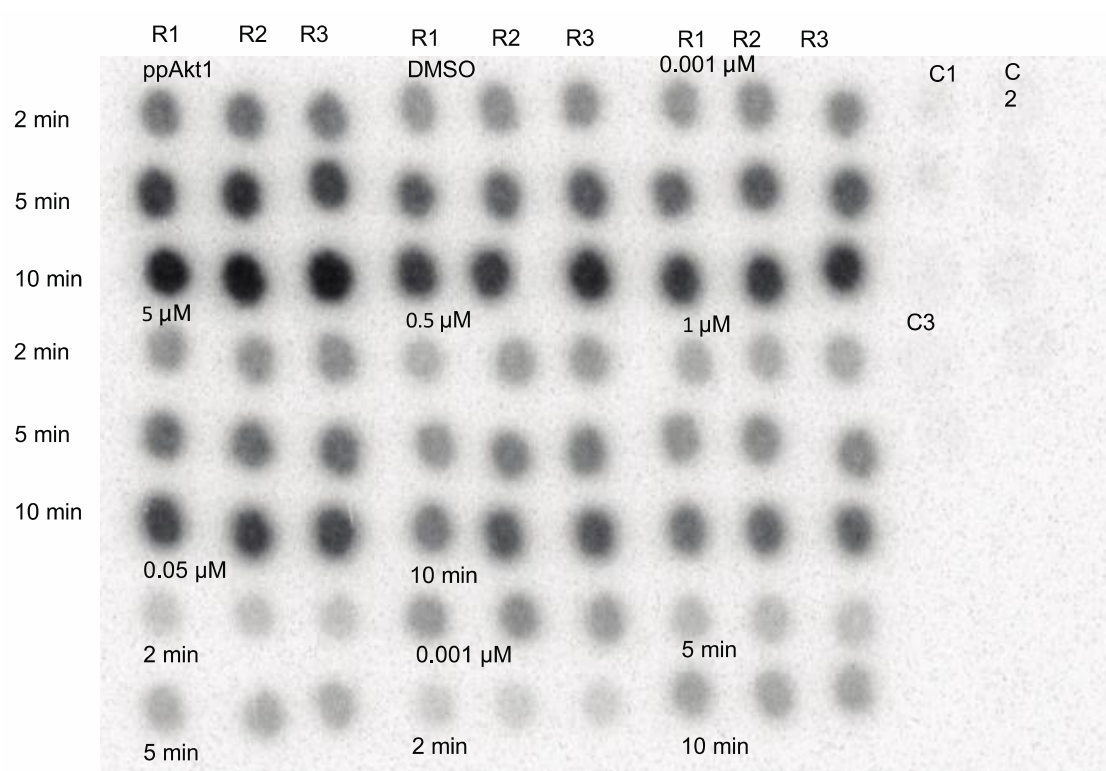

**Figure S4.** Autoradiographs of Akt1 inhibitor assays with ppAkt1<sup>T308, S473</sup>. Time courses are shown for the reaction catalyzed by ppAkt1<sup>T308, S473</sup> with the indicated concentrations of inhibitor Akti1/2. Assays were performed in triplicate (as indicated by R1-R3). Controls include: C1 without substrate peptide, C2 without enzyme, C3 only kinase assay buffer.

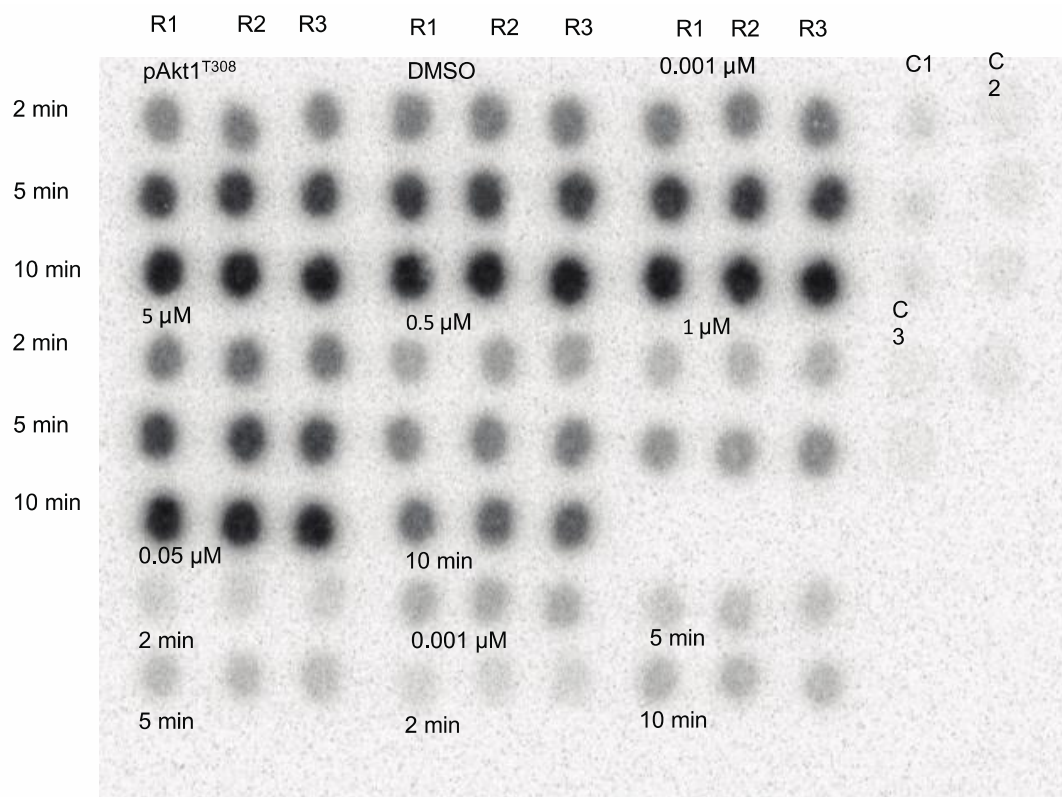

**Figure S5.** Autoradiographs of Akt1 inhibitor assays with pAkt1<sup>T308</sup>. Time courses are shown for the reaction catalyzed by pAkt1<sup>T308</sup> with the indicated concentrations of inhibitor Akti1/2. Assays were performed in triplicate (as indicated by R1-R3). Controls include: C1 without substrate peptide, C2 without enzyme, C3 only kinase assay buffer.

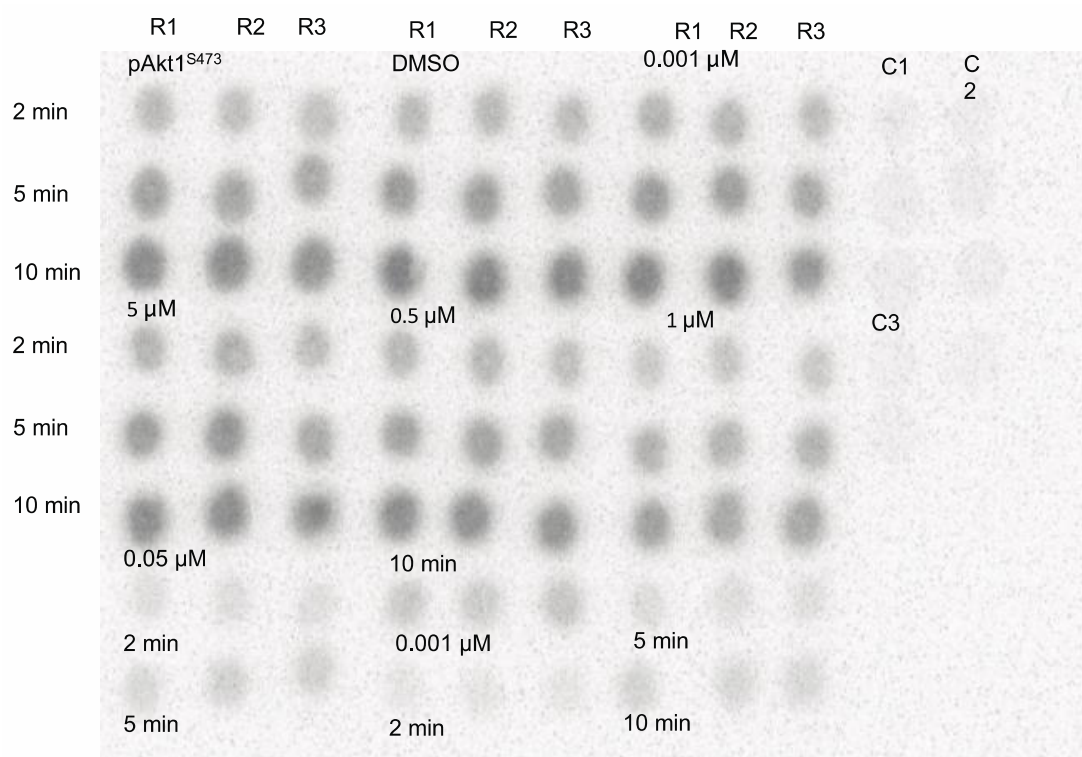

**Figure S6.** Autoradiographs of Akt1 inhibitor assays with pAkt1<sup>S473</sup>. Time courses are shown for the reaction catalyzed by pAkt1<sup>S473</sup> with the indicated concentrations of inhibitor Akti1/2. Assays were performed in triplicate (as indicated by R1-R3). Controls include: C1 without substrate peptide, C2 without enzyme, C3 only kinase assay buffer.
